# Supplementary material for: Temporal Dynamics of Biomarker Response in Folsomia candida Exposed to Azoxystrobin
Source: MDPI journal article supplement (doi:10.3390/agriculture13071443), 2023-07-21
Supplement: s1 [file s1]

**Table S1.** Results from the Linear mixed models (LMM). LMM to predict biomarker responses with concentration (formula: *biomarker* ~ conc). The model included replicate as a random effect (formula: ~1 | replicate). Analysis was performed using R package nlme.

|                     |         | formula                  | random effect | conditional R <sup>2</sup> | marginal R <sup>2</sup> | Intercept | 95% CI       | t(54) | P        |
|---------------------|---------|--------------------------|---------------|----------------------------|-------------------------|-----------|--------------|-------|----------|
| <b>Protein</b>      |         |                          |               |                            |                         |           |              |       |          |
|                     | 3 days  | protein ~ concentration  | replicate     | 0.35                       | 0.34                    | 0.90      | [0.83, 0.97] | 25.63 | p < .001 |
|                     | 5 days  | protein ~ concentration  | replicate     | 0.60                       | 0.50                    | 1.20      | [1.12, 1.28] | 31.61 | p < .001 |
|                     | 7 days  | protein ~ concentration  | replicate     | 0.60                       | 0.57                    | 1.58      | [1.46, 1.70] | 27.09 | p < .001 |
|                     | 14 days | protein ~ concentration  | replicate     | 0.66                       | 0.60                    | 1.33      | [1.22, 1.43] | 24.77 | p < .001 |
|                     | 28 days | protein ~ concentration  | replicate     | 0.48                       | 0.46                    | 1.61      | [1.45, 1.76] | 20.73 | p < .001 |
| <b>Glycogen</b>     |         |                          |               |                            |                         |           |              |       |          |
|                     | 3 days  | glycogen ~ concentration | replicate     | 0.63                       | 0.60                    | 1.53      | [1.38, 1.67] | 21.25 | p < .001 |
|                     | 5 days  | glycogen ~ concentration | replicate     | 0.19                       | 0.19                    | 0.96      | [0.92, 1.00] | 44.90 | p < .001 |
|                     | 7 days  | glycogen ~ concentration | replicate     | 0.43                       | 0.43                    | 1.08      | [1.03, 1.14] | 41.13 | p < .001 |
|                     | 14 days | glycogen ~ concentration | replicate     | 0.58                       | 0.47                    | 1.45      | [1.24, 1.67] | 13.76 | p < .001 |
|                     | 28 days | glycogen ~ concentration | replicate     | 0.65                       | 0.65                    | 2.02      | [1.90, 2.13] | 35.13 | p < .001 |
| <b>Total lipids</b> |         |                          |               |                            |                         |           |              |       |          |
|                     | 3 days  | lipids ~ concentration   | replicate     | 0.34                       | 0.4                     | 0.76      | [0.72, 0.80] | 37.85 | p < .001 |
|                     | 5 days  | lipids ~ concentration   | replicate     | 0.06                       | 0.02                    | 1.01      | [0.97, 1.05] | 48.84 | p < .001 |
|                     | 7 days  | lipids ~ concentration   | replicate     | 0.52                       | 0.52                    | 0.93      | [0.91, 0.96] | 69.97 | p < .001 |
|                     | 14 days | lipids ~ concentration   | replicate     | 0.37                       | 0.37                    | 0.75      | [0.67, 0.84] | 18.39 | p < .001 |
|                     | 28 days | lipids ~ concentration   | replicate     | 0.22                       | 0.16                    | 0.96      | [0.89, 1.03] | 29.32 | p < .001 |
| <b>CAT activity</b> |         |                          |               |                            |                         |           |              |       |          |
|                     | 3 days  | cat ~ concentration      | replicate     | 0.39                       | 0.30                    | 1.10      | [0.88, 1.31] | 10.28 | p < .001 |
|                     | 5 days  | cat ~ concentration      | replicate     | 0.71                       | 0.52                    | 0.69      | [0.56, 0.82] | 10.89 | p < .001 |
|                     | 7 days  | cat ~ concentration      | replicate     | 0.60                       | 0.60                    | 0.56      | [0.52, 0.60] | 27.56 | p < .001 |
|                     | 14 days | cat ~ concentration      | replicate     | 0.60                       | 0.55                    | 0.83      | [0.68, 0.97] | 11.34 | p < .001 |
|                     | 28 days | cat ~ concentration      | replicate     | 0.47                       | 0.45                    | 0.78      | [0.71, 0.85] | 22.18 | p < .001 |
| <b>SOD activity</b> |         |                          |               |                            |                         |           |              |       |          |
|                     | 3 days  | sod ~ concentration      | replicate     | 0.27                       | 0.24                    | 0.96      | [0.80, 1.13] | 11.84 | p < .001 |

|                          |                      |           |      |      |      |              |       |          |
|--------------------------|----------------------|-----------|------|------|------|--------------|-------|----------|
| <i>5 days</i>            | sod ~ concentration  | replicate | 0.20 | 0.20 | 0.91 | [0.85, 0.96] | 32.96 | p < .001 |
| <i>7 days</i>            | sod ~ concentration  | replicate | 0.53 | 0.44 | 0.58 | [0.46, 0.70] | 9.54  | p < .001 |
| <i>14 days</i>           | sod ~ concentration  | replicate | 0.36 | 0.35 | 0.69 | [0.60, 0.79] | 14.6  | p < .001 |
| <i>28 days</i>           | sod ~ concentration  | replicate | 0.19 | 0.19 | 1.38 | [1.22, 1.54] | 16.89 | p < .001 |
| <b>GST activity</b>      |                      |           |      |      |      |              |       |          |
| <i>3 days</i>            | gst ~ concentration  | replicate | 0.44 | 0.41 | 1.16 | [1.03, 1.30] | 17.36 | p < .001 |
| <i>5 days</i>            | gst ~ concentration  | replicate | 0.46 | 0.34 | 0.92 | [0.86, 0.99] | 27.72 | p < .001 |
| <i>7 days</i>            | gst ~ concentration  | replicate | 0.57 | 0.51 | 0.58 | [0.50, 0.66] | 14.36 | p < .001 |
| <i>14 days</i>           | gst ~ concentration  | replicate | 0.51 | 0.45 | 0.98 | [0.89, 1.08] | 20.85 | p < .001 |
| <i>28 days</i>           | gst ~ concentration  | replicate | 0.45 | 0.43 | 0.72 | [0.67, 0.77] | 28.48 | p < .001 |
| <b>MDA concentration</b> |                      |           |      |      |      |              |       |          |
| <i>3 days</i>            | mda ~ concentration  | replicate | 0.47 | 0.47 | 1.27 | [1.24, 1.31] | 81.36 | p < .001 |
| <i>5 days</i>            | mda ~ concentration  | replicate | 0.67 | 0.59 | 1.44 | [1.32, 1.56] | 24.84 | p < .001 |
| <i>7 days</i>            | mda ~ concentration  | replicate | 0.61 | 0.61 | 0.91 | [0.89, 0.93] | 85.34 | p < .001 |
| <i>14 days</i>           | mda ~ concentration  | replicate | 0.65 | 0.61 | 1.26 | [1.18, 1.35] | 29.7  | p < .001 |
| <i>28 days</i>           | mda ~ concentration  | replicate | 0.80 | 0.80 | 1.55 | [1.50, 1.59] | 66.78 | p < .001 |
| <b>AChE activity</b>     |                      |           |      |      |      |              |       |          |
| <i>3 days</i>            | ache ~ concentration | replicate | 0.47 | 0.47 | 0.53 | [0.48, 0.58] | 19.88 | p < .001 |
| <i>5 days</i>            | ache ~ concentration | replicate | 0.63 | 0.62 | 0.42 | [0.36, 0.48] | 13.34 | p < .001 |
| <i>7 days</i>            | ache ~ concentration | replicate | 0.62 | 0.61 | 0.43 | [0.36, 0.49] | 13.1  | p < .001 |
| <i>14 days</i>           | ache ~ concentration | replicate | 0.47 | 0.47 | 0.63 | [0.58, 0.67] | 28.57 | p < .001 |
| <i>28 days</i>           | ache ~ concentration | replicate | 0.34 | 0.34 | 0.63 | [0.56, 0.71] | 16.71 | p < .001 |

**Table S2.** Results from One-way ANOVA performed on LMM model.

|                     | <b>F(6,56)</b> | <b>p</b>   | <b><math>\eta^2</math></b> | <b>95% CI</b> |
|---------------------|----------------|------------|----------------------------|---------------|
| <b>Protein</b>      |                |            |                            |               |
| <i>3 days</i>       | 5.37           | $p < .001$ | 0.37                       | [0.15, 1.00]  |
| <i>5 days</i>       | 10.83          | $p < .001$ | 0.54                       | [0.36, 1.00]  |
| <i>7 days</i>       | 13.88          | $p < .001$ | 0.6                        | [0.44, 1.00]  |
| <i>14 days</i>      | 16.09          | $p < .001$ | 0.63                       | [0.48, 1.00]  |
| <i>28 days</i>      | 8.74           | $p < .001$ | 0.48                       | [0.29, 1.00]  |
| <b>Glycogen</b>     |                |            |                            |               |
| <i>3 days</i>       | 15.71          | $p < .001$ | 0.63                       | [0.48, 1.00]  |
| <i>5 days</i>       | 2.44           | 0.036      | 0.21                       | [0.08, 1.00]  |
| <i>7 days</i>       | 7.74           | $p < .001$ | 0.45                       | [0.25, 1.00]  |
| <i>14 days</i>      | 9.64           | $p < .001$ | 0.51                       | [0.32, 1.00]  |
| <i>28 days</i>      | 19.28          | $p < .001$ | 0.67                       | [0.54, 1.00]  |
| <b>Total lipids</b> |                | $p < .001$ |                            |               |
| <i>3 days</i>       | 5.34           |            | 0.36                       | [0.15, 1.00]  |
| <i>5 days</i>       | 0.19           | 0.978      | 0.02                       | [0.00, 1.00]  |
| <i>7 days</i>       | 11.27          | $p < .001$ | 0.55                       | [0.37, 1.00]  |
| <i>14 days</i>      | 6.06           | $p < .001$ | 0.39                       | [0.18, 1.00]  |
| <i>28 days</i>      | 2.08           | 0.07       | 0.18                       | [0.00, 1.00]  |
| <b>CAT activity</b> |                |            |                            |               |
| <i>3 days</i>       | 4.57           | $p < .001$ | 0.33                       | [0.11, 1.00]  |
| <i>5 days</i>       | 12.31          | $p < .001$ | 0.57                       | [0.40, 1.00]  |
| <i>7 days</i>       | 15.34          | $p < .001$ | 0.62                       | [0.47, 1.00]  |
| <i>14 days</i>      | 13.07          | $p < .001$ | 0.58                       | [0.42, 1.00]  |
| <i>28 days</i>      | 8.48           | $p < .001$ | 0.48                       | [0.28, 1.00]  |
| <b>SOD activity</b> |                |            |                            |               |
| <i>3 days</i>       | 3.24           | 0.008      | 0.26                       | [0.05, 1.00]  |

|                          |       |          |      |              |
|--------------------------|-------|----------|------|--------------|
| <i>5 days</i>            | 2.61  | 0.027    | 0.22 | [0.02, 1.00] |
| <i>7 days</i>            | 8.47  | p < .001 | 0.48 | [0.28, 1.00] |
| <i>14 days</i>           | 5.53  | p < .001 | 0.37 | [0.16, 1.00] |
| <i>28 days</i>           | 2.48  | 0.034    | 0.21 | [0.01, 1.00] |
| <b>GST activity</b>      |       |          |      |              |
| <i>3 days</i>            | 7.32  | p < .001 | 0.44 | [0.24, 1.00] |
| <i>5 days</i>            | 5.61  | p < .001 | 0.38 | [0.16, 1.00] |
| <i>7 days</i>            | 11.06 | p < .001 | 0.54 | [0.36, 1.00] |
| <i>14 days</i>           | 8.65  | p < .001 | 0.48 | [0.29, 1.00] |
| <i>28 days</i>           | 7.83  | p < .001 | 0.46 | [0.26, 1.00] |
| <b>MDA concentration</b> |       |          |      |              |
| <i>3 days</i>            | 9.25  | p < .001 | 0.50 | [0.31, 1.00] |
| <i>5 days</i>            | 15.87 | p < .001 | 0.63 | [0.48, 1.00] |
| <i>7 days</i>            | 16.23 | p < .001 | 0.63 | [0.49, 1.00] |
| <i>14 days</i>           | 16.42 | p < .001 | 0.64 | [0.49, 1.00] |
| <i>28 days</i>           | 41.59 | p < .001 | 0.82 | [0.74, 1.00] |
| <b>AChE activity</b>     |       |          |      |              |
| <i>3 days</i>            | 9.32  | p < .001 | 0.50 | [0.31, 1.00] |
| <i>5 days</i>            | 16.8  | p < .001 | 0.64 | [0.50, 1.00] |
| <i>7 days</i>            | 16.05 | p < .001 | 0.63 | [0.48, 1.00] |
| <i>14 days</i>           | 9.17  | p < .001 | 0.50 | [0.30, 1.00] |
| <i>28 days</i>           | 5.36  | p < .001 | 0.36 | [0.15, 1.00] |
